# Supplementary material
Source: Springer Nature journal article supplement (https://www.springermedizin.de/resource/supplementary/12936_2013_3061_MOESM1_ESM.pdf/9545010)

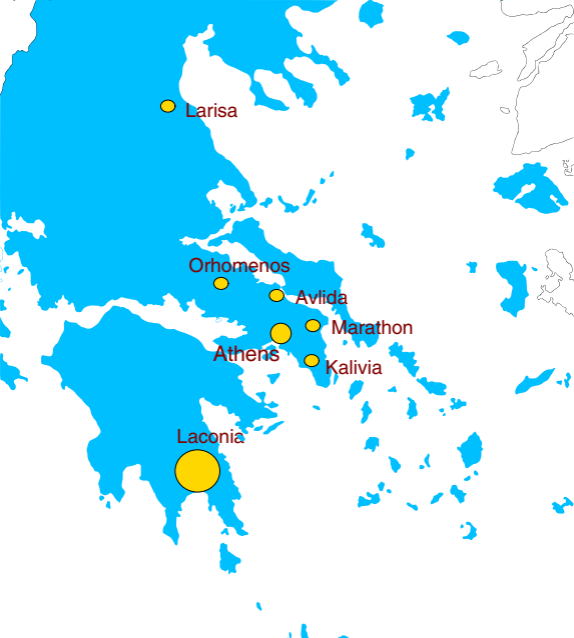

Larisa

Orhomenos

Avlida

Marathon

Athens

Kalivia

Laconia

Supplement: MOESM1 [file 9545010]
